# Supplementary material for: Analysis of the Mouse Y Chromosome by Single-Molecule Sequencing With Y Chromosome Enrichment
Source: Front Genet. 2020 May 7;11:406. doi: 10.3389/fgene.2020.00406 (PMC7221202; doi:10.3389/fgene.2020.00406)
Supplement: TABLE S8 — Summary of the reads that mapped to the genome with the mouse MSY sequence from Soh et al. There were no significant differences in the number of reads mapped to the created genome compared to those mapped to the GRCm38.p6 genome. [file Table_8.XLSX]

## Sheet: raw reads
chromosome	number of reads	sum_len (bp)	min_len (bp)	avg_len (bp)	standard deviation	N50 (bp)	max_len (bp)	fold coverage (x)
chr1	137798	273076138	41	1981.7	3201.52	3557	79189	1.39701
chr2	159880	270462489	51	1691.7	2957.75	3510	96114	1.48513
chr3	112739	217669085	46	1930.7	3019	3523	101793	1.36009
chr4	94468	168929184	46	1788.2	2837.36	3464	77896	1.07936
chr5	96438	179864741	58	1865.1	2648.44	3499	81513	1.18461
chr6	88046	156189362	57	1774	2737.11	3430	62060	1.04309
chr7	82035	139935933	59	1705.8	2616.79	3262	192710	0.962146
chr8	78438	146917956	39	1873	2889.26	3505	77922	1.13537
chr9	394638	1809487688	53	4585.2	6259.75	9784	115796	14.5229
chr10	82299	151141654	35	1836.5	2544.53	3474	75705	1.15645
chr11	109801	249738903	51	2274.5	3462.23	4549	70070	2.04566
chr12	81860	148538452	62	1814.5	2666.17	3454	58701	1.23649
chr13	128930	313606292	55	2432.4	2261.72	3521	92246	2.60424
chr14	80397	147419616	44	1833.6	2619.38	3479	73694	1.18028
chr15	570333	2041844045	44	3580.1	5015.28	7611	119870	19.6249
chr16	413953	1467339308	56	3544.7	4646.42	7165	97974	14.9412
chr17	1176845	4308475190	58	3661	5234.28	7977	106564	45.3584
chr18	776855	2792467109	52	3594.6	5051.16	7200	118594	30.7871
chr19	145067	327711332	45	2259	3504.27	4333	94879	5.33458
chrX	76977	190963582	67	2480.8	3839.07	4221	180253	1.11654
Soh et al. mouse MSY	376037	1540696759	75	4097.2	5576.49	8053	113230	16.7933
chrM	26911	48946311	102	1818.8	2162.13	3154	30124	3003.03

## Sheet: flye assembly
chromosome	number of reads	sum_len (bp)	min_len (bp)	avg_len (bp)	standard deviation	N50 (bp)	max_len (bp)	coverage (%)
chr1	14	128936	256	9209.7	19340.6	76344	76344	0.0659614
chr2	188	200889	71	1068.6	5097.35	8933	66850	0.11031
chr3	6	40816	164	6802.7	6345.2	7836	19510	0.0255037
chr4	14	286389	675	20456.4	16673.4	36852	44689	0.182987
chr5	12	219799	663	18316.6	12225.5	23926	48483	0.144762
chr6	7	43018	405	6145.4	6914.59	11258	20108	0.0287291
chr7	14	178173	420	12726.6	11294.6	22825	42103	0.122505
chr8	7	139630	183	19947.1	41665.2	121842	121842	0.107905
chr9	853	3232612	75	3789.7	5674.02	8334	67628	2.59449
chr10	6	10670	412	1778.3	1423.4	2095	4691	0.00816405
chr11	13	159443	697	12264.8	21344.8	80759	80759	0.130603
chr12	13	278012	108	21385.5	29420.8	46752	107042	0.231428
chr13	11	103294	391	9390.4	14456.7	21357	51627	0.0857769
chr14	20	185303	70	9265.1	22828.8	69078	84998	0.148358
chr15	217	98198256	422	452526	754581	1371947	4396931	94.3818
chr16	350	92387434	125	263964	322986	528130	1927532	94.0734
chr17	357	90051989	276	252246	876812	3088147	7553786	94.8043
chr18	137	87198419	533	636485	1.15355e+06	1716556	8543528	96.1366
chr19	87	2926567	728	33638.7	34741.4	64763	177129	4.76395
chrX	49	1294262	386	26413.5	21977.9	43878	75439	0.75674
Soh et al. mouse MSY	216	2489157	150	11523.9	25075	42109	213876	2.71313
chrM	3	14941	889	4980.3	3207.35	8722	8722	91.6682
